# Supplementary material
Source: Springer Nature journal article supplement (https://www.springermedizin.de/resource/supplementary/12865_2013_578_MOESM3_ESM.pdf/9428274)

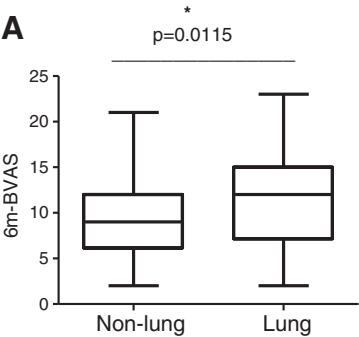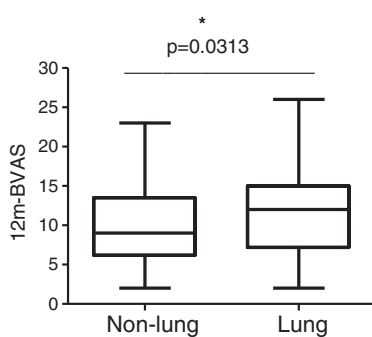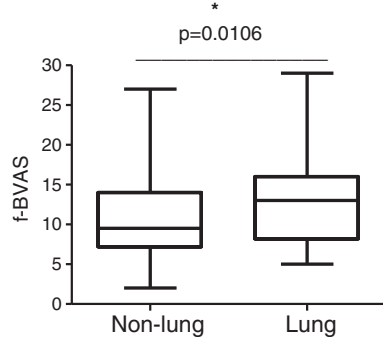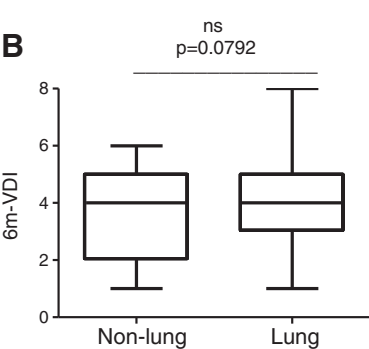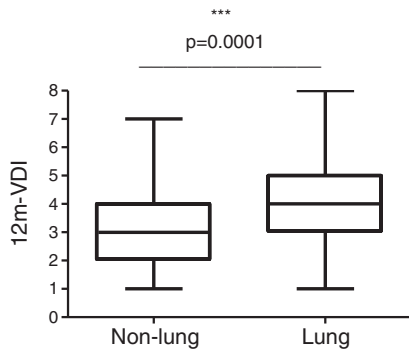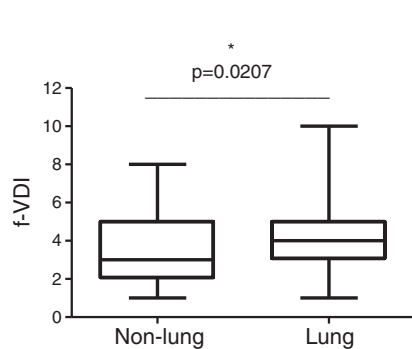

Supplement: MOESM3 [file 9428274]
